# Supplementary material
Source: PubMed Central journal article supplement (PMC5423521)
Supplement: supp_the2016-0357_onco12110-sup-0002-suppinfo2.pdf [file supp_the2016-0357_onco12110-sup-0002-suppinfo2.pdf]

| Drug 1      | Drug 2         | Drug 3                    | Disease                      | Phase | Number of Subjects | Drug 1 Dose Percent | Drug 2 Dose Percent | Drug 3 Dose Percent |
|-------------|----------------|---------------------------|------------------------------|-------|--------------------|---------------------|---------------------|---------------------|
| AEG35156    | cytarabine     | idarubicin                | acute myeloid leukemia       | 2     | 27                 | 69%                 | 100%                | 100%                |
| afatinib    | 5-fluorouracil | cisplatin                 | advanced solid tumors        | 1     | 47                 | 75%                 | 100%                | 47%                 |
| afatinib    | cisplatin      | paclitaxel                | advanced solid tumors        | 1     | 47                 | 50%                 | 100%                | 100%                |
| aflibercept | 5-fluorouracil | irinotecan                | advanced solid tumor         | 1     | 27                 | 100%                | 100%                | 100%                |
| aflibercept | 5-fluorouracil | irinotecan                | colorectal cancer            | 3     | 604                | 100%                | 100%                | 100%                |
| aflibercept | 5-fluorouracil | irinotecan                | colorectal cancer            | 1     | 16                 | 100%                | 100%                | 90%                 |
| aflibercept | 5-fluorouracil | irinotecan                | solid tumors                 | 1     | 38                 | 100%                | 100%                | 100%                |
| aflibercept | 5-fluorouracil | irinotecan                | metastatic colorectal cancer | 3     | 604                | 100%                | 100%                | 100%                |
| aflibercept | cisplatin      | docetaxel                 | solid tumors                 | 1     | 30                 | 100%                | 100%                | 100%                |
| aflibercept | cisplatin      | pemetrexed                | non-small cell lung cancer   | 2     | 42                 | 100%                | 100%                | 100%                |
| aflibercept | cisplatin      | pemetrexed                | advanced solid tumors        | 1     | 18                 | 100%                | 100%                | 100%                |
| alemtuzumab | cytoxan        | fludarabine               | chronic lymphocytic leukemia | 2     | 43                 | 17%                 | 60%                 | 69%                 |
| alemtuzumab | cytoxan        | fludarabine               | chronic lymphocytic leukemia | 3     | 80                 | 25%                 | 96%                 | 80%                 |
| AT-101      | cisplatin      | etoposide                 | advanced solid tumors        | 1     | 20                 | 76%                 | 80%                 | 40%                 |
| AVE1642     | erlotinib      | gemcitabine               | advanced solid tumors        | 1     | 10                 | 33%                 | 50%                 | 50%                 |
| axitinib    | 5-fluorouracil | oxaliplatin               | colorectal cancer            | 2     | 39                 | 100%                | 100%                | 100%                |
| axitinib    | 5-fluorouracil | oxaliplatin or irinotecan | solid tumors                 | 1     | 14                 | 100%                | 100%                | 100%                |
| axitinib    | carboplatin    | paclitaxel                | solid tumors                 | 1     | 28                 | 100%                | 100%                | 100%                |
| axitinib    | cisplatin      | gemcitabine               | solid tumors                 | 1     | 21                 | 100%                | 100%                | 80%                 |
| belinostat  | carboplatin    | paclitaxel                | advanced solid tumors        | 1     | 23                 | 100%                | 100%                | 57%                 |
| belinostat  | carboplatin    | paclitaxel                | ovarian cancer               | 2     | 35                 | 100%                | 100%                | 100%                |
| bevacizumab | 5-fluorouracil | cetuximab                 | colorectal cancer            | 3     | 121                | 50%                 | 100%                | 100%                |
| bevacizumab | 5-fluorouracil | cisplatin                 | advanced esophageal cancer   | 2     | 28                 | 50%                 | 47%                 | 100%                |
| bevacizumab | 5-fluorouracil | enzastaurin               | metastatic colorectal cancer | 2     | 58                 | 50%                 | 95%                 | 100%                |
| bevacizumab | 5-fluorouracil | gemcitabine               | metastatic colorectal cancer | 2     | 18                 | 50%                 | 64%                 | 100%                |
| bevacizumab | 5-fluorouracil | irinotecan                | metastatic colorectal cancer | 2     | 72                 | 50%                 | 100%                | 100%                |
| bevacizumab | 5-fluorouracil | irinotecan                | metastatic colorectal cancer | 2     | 25                 | 100%                | 100%                | 90%                 |
| bevacizumab | 5-fluorouracil | irinotecan                | metastatic colorectal cancer | 2     | 167                | 50%                 | 100%                | 100%                |
| bevacizumab | 5-fluorouracil | irinotecan                | metastatic colorectal cancer | 3     | 142                | 50%                 | 63%                 | 100%                |
| bevacizumab | 5-fluorouracil | irinotecan                | metastatic colorectal cancer | 2     | 43                 | 50%                 | 100%                | 100%                |
| bevacizumab | 5-fluorouracil | irinotecan                | metastatic colorectal cancer | 2     | 37                 | 50%                 | 100%                | 100%                |
| bevacizumab | 5-fluorouracil | irinotecan                | advanced colorectal cancer   | 2     | 47                 | 50%                 | 90%                 | 100%                |

|             |                |             |                                   |         |      |      |      |      |
|-------------|----------------|-------------|-----------------------------------|---------|------|------|------|------|
| bevacizumab | 5-fluorouracil | irinotecan  | metastatic colorectal cancer      | 2       | 39   | 50%  | 100% | 100% |
| bevacizumab | 5-fluorouracil | irinotecan  | metastatic colorectal cancer      | 3       | 131  | 50%  | 100% | 100% |
| bevacizumab | 5-fluorouracil | irinotecan  | metastatic colorectal cancer      | 2       | 30   | 50%  | 90%  | 100% |
| bevacizumab | 5-fluorouracil | irinotecan  | metastatic colorectal cancer      | 2       | 61   | 50%  | 100% | 100% |
| bevacizumab | 5-fluorouracil | irinotecan  | metastatic colorectal cancer      | 2       | 34   | 50%  | 90%  | 100% |
| bevacizumab | 5-fluorouracil | irinotecan  | metastatic colorectal cancer      | 2       | 55   | 50%  | 100% | 100% |
| bevacizumab | 5-fluorouracil | oxaliplatin | advanced colorectal cancer        | 3       | 713  | 50%  | 100% | 100% |
| bevacizumab | 5-fluorouracil | oxaliplatin | colon cancer                      | 3       | 1155 | 50%  | 94%  | 98%  |
| bevacizumab | 5-fluorouracil | oxaliplatin | colon cancer                      | 3       | 1354 | 50%  | 100% | 100% |
| bevacizumab | 5-fluorouracil | oxaliplatin | colorectal cancer                 | 3       | 118  | 50%  | 100% | 100% |
| bevacizumab | 5-fluorouracil | oxaliplatin | metastatic colon cancer           | 2       | 21   | 50%  | 100% | 100% |
| bevacizumab | 5-fluorouracil | oxaliplatin | metastatic colorectal cancer      | 2       | 18   | 50%  | 100% | 100% |
| bevacizumab | 5-fluorouracil | oxaliplatin | metastatic colorectal cancer      | 2       | 50   | 50%  | 100% | 100% |
| bevacizumab | 5-fluorouracil | oxaliplatin | metastatic colorectal cancer      | 3       | 66   | 100% | 100% | 100% |
| bevacizumab | 5-fluorouracil | oxaliplatin | metastatic colorectal cancer      | 2       | 43   | 50%  | 100% | 100% |
| bevacizumab | 5-fluorouracil | oxaliplatin | metastatic colorectal cancer      | 2       | 64   | 50%  | 100% | 100% |
| bevacizumab | 5-fluorouracil | oxaliplatin | metastatic colon cancer           | 2       | 86   | 50%  | 100% | 100% |
| bevacizumab | 5-fluorouracil | oxaliplatin | advanced colorectal cancer        | 2       | 47   | 50%  | 100% | 100% |
| bevacizumab | 5-fluorouracil | oxaliplatin | colorectal cancer                 | 3       | 255  | 50%  | 100% | 100% |
| bevacizumab | 5-fluorouracil | oxaliplatin | metastatic colorectal cancer      | 2       | 3    | 50%  | 100% | 100% |
| bevacizumab | 5-fluorouracil | oxaliplatin | metastatic colorectal cancer      | 2       | 48   | 50%  | 100% | 100% |
| bevacizumab | 5-fluorouracil | oxaliplatin | colorectal cancer                 | 2       | 68   | 50%  | 100% | 100% |
| bevacizumab | capecitabine   | cisplatin   | gastric cancer                    | 3       | 387  | 50%  | 100% | 80%  |
| bevacizumab | capecitabine   | docetaxel   | HER2 negative breast cancer       | 2       | 45   | 100% | 100% | 66%  |
| bevacizumab | capecitabine   | docetaxel   | metastatic breast cancer          | 2       | 45   | 100% | 100% | 66%  |
| bevacizumab | capecitabine   | gemcitabine | metastatic renal cell carcinoma   | 2       | 29   | 100% | 45%  | 100% |
| bevacizumab | capecitabine   | irinotecan  | metastatic colorectal cancer      | 2       | 71   | 50%  | 80%  | 80%  |
| bevacizumab | capecitabine   | irinotecan  | metastatic colorectal cancer      | 2       | 166  | 50%  | 80%  | 100% |
| bevacizumab | capecitabine   | irinotecan  | metastatic colorectal cancer      | 2       | 50   | 50%  | 80%  | 80%  |
| bevacizumab | capecitabine   | irinotecan  | metastatic colorectal cancer      | 2       | 46   | 50%  | 100% | 60%  |
| bevacizumab | capecitabine   | irinotecan  | metastatic colorectal cancer      | 3       | 134  | 50%  | 96%  | 40%  |
| bevacizumab | capecitabine   | mitomycin   | metastatic colorectal cancer      | 3       | 158  | 100% | 100% | 35%  |
| bevacizumab | capecitabine   | oxaliplatin | advanced colorectal cancer        | 1 and 2 | 39   | 50%  | 90%  | 100% |
| bevacizumab | capecitabine   | oxaliplatin | advanced hepatocellular carcinoma | 2       | 40   | 33%  | 66%  | 100% |

|             |              |                       |                                                          |         |      |      |      |      |
|-------------|--------------|-----------------------|----------------------------------------------------------|---------|------|------|------|------|
| bevacizumab | capecitabine | oxaliplatin           | metastatic colorectal cancer                             | 3       | 123  | 50%  | 80%  | 100% |
| bevacizumab | capecitabine | oxaliplatin           | metastatic colorectal cancer                             | 2       | 50   | 100% | 73%  | 100% |
| bevacizumab | capecitabine | oxaliplatin           | metastatic colorectal cancer                             | 3       | 480  | 50%  | 80%  | 100% |
| bevacizumab | capecitabine | oxaliplatin           | metastatic colorectal cancer                             | 2       | 46   | 50%  | 68%  | 100% |
| bevacizumab | capecitabine | oxaliplatin           | rectal cancer                                            | 2       | 32   | 50%  | 80%  | 100% |
| bevacizumab | capecitabine | oxaliplatin           | colon cancer                                             | 3       | 1145 | 50%  | 100% | 86%  |
| bevacizumab | capecitabine | oxaliplatin           | esophageal adenocarcinoma                                | 2       | 35   | 100% | 100% | 68%  |
| bevacizumab | capecitabine | oxaliplatin           | metastatic colorectal cancer                             | 1 and 2 | 58   | 50%  | 100% | 80%  |
| bevacizumab | capecitabine | oxaliplatin           | rectal cancer                                            | 2       | 49   | 50%  | 100% | 80%  |
| bevacizumab | capecitabine | oxaliplatin           | metastatic colorectal cancer                             | 2       | 211  | 50%  | 90%  | 100% |
| bevacizumab | capecitabine | oxaliplatin           | metastatic colorectal cancer                             | 2       | 208  | 50%  | 68%  | 100% |
| bevacizumab | capecitabine | trastuzumab           | HER2 positive breast cancer                              | 2       | 88   | 100% | 100% | 80%  |
| bevacizumab | carboplatin  | docetaxel             | non-small cell lung cancer                               | 2       | 40   | 100% | 100% | 100% |
| bevacizumab | carboplatin  | etoposide             | small cell lung cancer                                   | 2       | 26   | 100% | 100% | 100% |
| bevacizumab | carboplatin  | gemcitabine           | epithelial ovarian, peritoneal, or fallopian tube cancer | 3       | 241  | 100% | 100% | 100% |
| bevacizumab | carboplatin  | gemcitabine           | non-squamous non-small cell lung cancer                  | 2       | 48   | 100% | 100% | 100% |
| bevacizumab | carboplatin  | gemcitabine           | metastatic urothelial cancer                             | 2       | 51   | 100% | 100% | 100% |
| bevacizumab | carboplatin  | irinotecan            | recurrent glioblastoma                                   | 2       | 40   | 100% | 100% | 75%  |
| bevacizumab | carboplatin  | ixabepilone           | advanced non-small cell lung cancer                      | 2       | 40   | 100% | 100% | 75%  |
| bevacizumab | carboplatin  | liposomal doxorubicin | ovarian, fallopian tube, or primary peritoneal cancer    | 2       | 54   | 100% | 100% | 89%  |
| bevacizumab | carboplatin  | nab-paclitaxel        | metastatic melanoma                                      | 2       | 51   | 100% | 100% | 64%  |
| bevacizumab | carboplatin  | nab-paclitaxel        | triple negative metastatic breast cancer                 | 2       | 34   | 100% | 100% | 100% |
| bevacizumab | carboplatin  | paclitaxel            | advanced mullerian tumors                                | 2       | 62   | 100% | 100% | 100% |
| bevacizumab | carboplatin  | paclitaxel            | advanced non-squamous non-small cell lung cancer         | 2       | 119  | 100% | 100% | 100% |
| bevacizumab | carboplatin  | paclitaxel            | melanoma                                                 | 2       | 143  | 100% | 100% | 100% |
| bevacizumab | carboplatin  | paclitaxel            | non-small cell lung cancer                               | 2       | 48   | 100% | 100% | 100% |
| bevacizumab | carboplatin  | paclitaxel            | non-squamous non-small-cell lung cancer                  | 3       | 443  | 100% | 100% | 100% |
| bevacizumab | carboplatin  | paclitaxel            | non-small cell lung cancer                               | 2       | 23   | 100% | 100% | 100% |
| bevacizumab | carboplatin  | paclitaxel            | non-small cell lung cancer                               | 2       | 26   | 100% | 100% | 100% |

|             |             |              |                                                     |         |     |      |      |      |
|-------------|-------------|--------------|-----------------------------------------------------|---------|-----|------|------|------|
| bevacizumab | carboplatin | paclitaxel   | non-squamous non-small cell lung cancer             | 2       | 63  | 100% | 100% | 100% |
| bevacizumab | carboplatin | paclitaxel   | ovarian cancer                                      | 2       | 189 | 50%  | 100% | 100% |
| bevacizumab | carboplatin | pemetrexed   | malignant pleural mesothelioma                      | 2       | 76  | 100% | 100% | 100% |
| bevacizumab | carboplatin | pemetrexed   | non-small cell lung cancer                          | 2       | 20  | 100% | 100% | 100% |
| bevacizumab | carboplatin | pemetrexed   | non-squamous non-small-cell lung cancer             | 3       | 442 | 100% | 100% | 100% |
| bevacizumab | carboplatin | pemetrexed   | non-squamous non-small cell lung cancer             | 2       | 40  | 100% | 100% | 100% |
| bevacizumab | carboplatin | S-1          | advanced nonsquamous non-small cell lung cancer     | 2       | 48  | 100% | 100% | 100% |
| bevacizumab | carboplatin | docetaxel    | triple-negative breast cancer                       | 2       | 45  | 100% | 100% | 100% |
| bevacizumab | cisplatin   | docetaxel    | non-squamous non-small cell lung cancer             | 2       | 48  | 100% | 100% | 100% |
| bevacizumab | cisplatin   | docetaxel    | resectable non-squamous non-small cell lung cancers | 2       | 50  | 100% | 100% | 100% |
| bevacizumab | cisplatin   | docetaxel    | metastatic breast cancer                            | 2       | 20  | 50%  | 100% | 100% |
| bevacizumab | cisplatin   | etoposide    | advanced non-small cell lung cancer                 | 1 and 2 | 48  | 50%  | 100% | 50%  |
| bevacizumab | cisplatin   | etoposide    | small cell lung cancer                              | 2       | 26  | 100% | 100% | 100% |
| bevacizumab | cisplatin   | gemcitabine  | malignant mesothelioma                              | 2       | 53  | 100% | 100% | 100% |
| bevacizumab | cisplatin   | gemcitabine  | metastatic urothelial cell carcinoma                | 2       | 43  | 100% | 93%  | 100% |
| bevacizumab | cisplatin   | irinotecan   | extensive-stage small cell lung cancer              | 2       | 64  | 100% | 80%  | 52%  |
| bevacizumab | cisplatin   | pemetrexed   | malignant mesothelioma                              | 2       | 52  | 100% | 100% | 94%  |
| bevacizumab | cisplatin   | S-1          | non-small cell lung cancer                          | 2       | 30  | 100% | 80%  | 100% |
| bevacizumab | cisplatin   | topotecan    | cervical cancer                                     | 2       | 27  | 100% | 67%  | 30%  |
| bevacizumab | cisplatin   | vinorelbine  | advanced non-squamous non-small cell lung cancer    | 2       | 49  | 100% | 100% | 67%  |
| bevacizumab | cytoxan     | doxorubicin  | breast cancer                                       | 2       | 78  | 100% | 100% | 86%  |
| bevacizumab | cytoxan     | doxorubicin  | HER2 positive breast cancer                         | 2       | 45  | 100% | 100% | 86%  |
| bevacizumab | docetaxel   | epirubicin   | HER2 negative metastatic breast cancer              | 1 and 2 | 83  | 100% | 100% | 100% |
| bevacizumab | docetaxel   | estramustine | prostate cancer                                     | 2       | 77  | 100% | 100% | 29%  |

|             |                       |                |                                                          |         |     |      |      |      |
|-------------|-----------------------|----------------|----------------------------------------------------------|---------|-----|------|------|------|
| bevacizumab | docetaxel             | gemcitabine    | soft tissue sarcoma                                      | 1       | 36  | 50%  | 100% | 100% |
| bevacizumab | docetaxel             | oxaliplatin    | metastatic gastric and gastroesophageal junction cancers | 2       | 38  | 50%  | 100% | 58%  |
| bevacizumab | docetaxel             | oxaliplatin    | non-small cell lung cancer                               | 2       | 53  | 100% | 100% | 77%  |
| bevacizumab | docetaxel             | thalidomide    | metastatic castrate resistant prostate cancer            | 2       | 60  | 100% | 100% | 100% |
| bevacizumab | docetaxel             | trastuzumab    | metastatic breast cancer                                 | 2       | 20  | 100% | 100% | 100% |
| bevacizumab | everolimus            | panitumumab    | advanced solid tumors                                    | 1       | 32  | 100% | 80%  | 21%  |
| bevacizumab | everolimus            | panobinostat   | advanced solid tumors                                    | 1       | 12  | 100% | 50%  | 33%  |
| bevacizumab | gemcitabine           | nab-paclitaxel | HER2 negative metastatic breast cancer                   | 2       | 29  | 100% | 100% | 80%  |
| bevacizumab | gemcitabine           | oxaliplatin    | advanced biliary tract cancers                           | 2       | 35  | 100% | 83%  | 100% |
| bevacizumab | gemcitabine           | oxaliplatin    | advanced pancreatic cancer                               | 2       | 50  | 100% | 83%  | 100% |
| bevacizumab | gemcitabine           | oxaliplatin    | advanced pancreatic cancer                               | 2       | 19  | 100% | 100% | 100% |
| bevacizumab | gemcitabine           | paclitaxel     | metastatic breast cancer                                 | 2       | 93  | 100% | 100% | 100% |
| bevacizumab | irinotecan            | S-1            | metastatic colon cancer                                  | 2       | 38  | 56%  | 38%  | 90%  |
| bevacizumab | irinotecan            | S-1            | colorectal cancer                                        | 2       | 52  | 40%  | 63%  | 60%  |
| bevacizumab | irinotecan            | S-1            | metastatic colorectal cancer                             | 2       | 30  | 50%  | 60%  | 100% |
| bevacizumab | irinotecan            | vorinostat     | glioblastoma multiforme                                  | 1       | 19  | 100% | 50%  | 50%  |
| bevacizumab | liposomal doxorubicin | temsirolimus   | advanced gynecologic/breast malignancies                 | 1       | 7   | 100% | 100% | 100% |
| bevacizumab | liposomal doxorubicin | temsirolimus   | advanced malignancies                                    | 1       | 136 | 100% | 100% | 100% |
| bevacizumab | oxaliplatin           | S-1            | advanced solid tumors                                    | 1       | 24  | 50%  | 100% | 66%  |
| bevacizumab | oxaliplatin           | S-1            | advanced solid tumors                                    | 1       | 24  | 50%  | 100% | 63%  |
| bevacizumab | oxaliplatin           | S-1            | colorectal cancer                                        | 3       | 256 | 50%  | 100% | 100% |
| bevacizumab | paclitaxel            | sorafenib      | advanced/metastatic solid tumors                         | 1       | 21  | 100% | 50%  | 100% |
| bevacizumab | paclitaxel            | vorinostat     | metastatic breast cancer                                 | 1 and 2 | 53  | 100% | 48%  | 100% |
| bexarotene  | carboplatin           | paclitaxel     | non-small cell lung cancer                               | 1       | 22  | 100% | 100% | 100% |
| bexarotene  | cisplatin             | vinorelbine    | advanced non-small cell lung cancer                      | 1       | 26  | 100% | 100% | 100% |
| bortezomib  | bendamustine          | rituximab      | relapsed or refractory follicular lymphoma               | 2       | 73  | 92%  | 100% | 90%  |

|            |                       |                       |                                                                          |   |     |      |      |      |
|------------|-----------------------|-----------------------|--------------------------------------------------------------------------|---|-----|------|------|------|
| bortezomib | bendamustine          | rituximab             | relapsed/refractory, indolent, and mantle cell non-Hodgkin's lymphoma    | 2 | 30  | 75%  | 25%  | 90%  |
| bortezomib | carboplatin           | paclitaxel            | metastatic malignant melanoma                                            | 2 | 17  | 75%  | 100% | 100% |
| bortezomib | gemcitabine           | liposomal doxorubicin | advanced malignancies                                                    | 1 | 28  | 100% | 89%  | 100% |
| bortezomib | liposomal doxorubicin | thalidomide           | multiple myeloma                                                         | 2 | 43  | 75%  | 100% | 100% |
| cediranib  | 5-fluorouracil        | oxaliplatin           | advanced colorectal cancer                                               | 3 | 709 | 44%  | 100% | 100% |
| cediranib  | 5-fluorouracil        | oxaliplatin           | advanced solid tumors                                                    | 1 | 14  | 67%  | 100% | 100% |
| cediranib  | 5-fluorouracil        | oxaliplatin           | colon cancer                                                             | 1 | 13  | 67%  | 100% | 100% |
| cediranib  | 5-fluorouracil        | oxaliplatin           | metastatic colorectal cancer                                             | 2 | 114 | 44%  | 100% | 100% |
| cediranib  | capecitabine          | cisplatin             | advanced gastric cancer                                                  | 1 | 6   | 44%  | 100% | 80%  |
| cediranib  | carboplatin           | gemcitabine           | non-small cell lung cancer                                               | 2 | 91  | 67%  | 100% | 100% |
| cediranib  | carboplatin           | paclitaxel            | advanced non-small cell lung cancer                                      | 2 | 126 | 100% | 100% | 100% |
| cediranib  | carboplatin           | paclitaxel            | advanced non-small cell lung cancer                                      | 3 | 151 | 67%  | 100% | 100% |
| cediranib  | cetuximab             | irinotecan            | advanced solid tumors                                                    | 1 | 5   | 67%  | 100% | 100% |
| cediranib  | cisplatin             | S-1                   | advanced gastric cancer                                                  | 1 | 8   | 44%  | 48%  | 45%  |
| cediranib  | 5-fluorouracil        | oxaliplatin           | metastatic colorectal cancer                                             | 3 | 144 | 100% | 100% | 100% |
| cetuximab  | 5-fluorouracil        | cisplatin             | recurrent and/or metastatic squamous cell carcinoma of the head and neck | 2 | 33  | 100% | 100% | 100% |
| cetuximab  | 5-fluorouracil        | irinotecan            | advanced gastroesophageal cancer                                         | 2 | 49  | 100% | 100% | 82%  |
| cetuximab  | 5-fluorouracil        | irinotecan            | metastatic colorectal cancer                                             | 2 | 55  | 100% | 100% | 100% |
| cetuximab  | 5-fluorouracil        | irinotecan            | metastatic colorectal cancer                                             | 2 | 74  | 100% | 100% | 100% |
| cetuximab  | 5-fluorouracil        | irinotecan            | colon cancer                                                             | 3 | 40  | 100% | 100% | 100% |
| cetuximab  | 5-fluorouracil        | oxaliplatin           | advanced colorectal cancer                                               | 2 | 82  | 100% | 100% | 100% |
| cetuximab  | 5-fluorouracil        | oxaliplatin           | colorectal cancer                                                        | 3 | 407 | 100% | 100% | 100% |
| cetuximab  | 5-fluorouracil        | oxaliplatin           | metastatic colorectal cancer                                             | 2 | 56  | 100% | 100% | 100% |
| cetuximab  | 5-fluorouracil        | oxaliplatin           | metastatic colorectal cancer                                             | 2 | 82  | 100% | 100% | 100% |
| cetuximab  | 5-fluorouracil        | oxaliplatin           | metastatic colorectal cancer                                             | 2 | 77  | 100% | 100% | 100% |
| cetuximab  | 5-fluorouracil        | oxaliplatin           | metastatic colorectal cancer                                             | 3 | 372 | 100% | 94%  | 100% |

|           |                |                         |                                                                |         |     |      |      |      |
|-----------|----------------|-------------------------|----------------------------------------------------------------|---------|-----|------|------|------|
| cetuximab | 5-fluorouracil | oxaliplatin             | KRAS wild-type metastatic colorectal cancer                    | 2       | 80  | 100% | 100% | 100% |
| cetuximab | 5-fluorouracil | oxaliplatin             | KRAS wild-type metastatic colorectal cancer                    | 2       | 81  | 100% | 100% | 100% |
| cetuximab | 5-fluorouracil | oxaliplatin             | metastatic colorectal cancer                                   | 2       | 150 | 100% | 100% | 100% |
| cetuximab | 5-fluorouracil | oxaliplatin             | metastatic colorectal cancer                                   | 2       | 72  | 100% | 100% | 100% |
| cetuximab | 5-fluorouracil | oxaliplatin             | metastatic head and neck cancer                                | 1       | 10  | 100% | 77%  | 100% |
| cetuximab | bevacizumab    | gemcitabine             | pancreatic cancer                                              | 2       | 30  | 100% | 100% | 100% |
| cetuximab | bevacizumab    | irinotecan              | glioblastoma multiforme                                        | 2       | 43  | 100% | 100% | 75%  |
| cetuximab | capecitabine   | cisplatin               | advanced gastric cancer                                        | 3       | 447 | 100% | 100% | 80%  |
| cetuximab | capecitabine   | everolimus              | advanced pancreatic cancer                                     | 1 and 2 | 46  | 100% | 50%  | 48%  |
| cetuximab | capecitabine   | gemcitabine             | biliary tract cancer                                           | 2       | 34  | 100% | 100% | 52%  |
| cetuximab | capecitabine   | irinotecan              | metastatic colorectal cancer                                   | 2       | 89  | 100% | 64%  | 80%  |
| cetuximab | capecitabine   | oxaliplatin             | metastatic colorectal cancer                                   | 2       | 12  | 100% | 68%  | 100% |
| cetuximab | capecitabine   | oxaliplatin             | metastatic colorectal cancer                                   | 2       | 88  | 100% | 64%  | 100% |
| cetuximab | capecitabine   | oxaliplatin             | metastatic or recurrent advanced gastric cancer                | 2       | 44  | 100% | 80%  | 100% |
| cetuximab | capecitabine   | oxaliplatin             | colorectal cancer                                              | 3       | 408 | 100% | 100% | 68%  |
| cetuximab | capecitabine   | oxaliplatin             | hepatocellular carcinoma                                       | 2       | 29  | 100% | 100% | 68%  |
| cetuximab | carboplatin    | docetaxel               | locally advanced or metastatic non-small cell lung cancer      | 2       | 74  | 100% | 100% | 100% |
| cetuximab | carboplatin    | paclitaxel              | advanced stage non-small cell lung cancer                      | 2       | 106 | 100% | 100% | 100% |
| cetuximab | carboplatin    | paclitaxel or docetaxel | advanced non-small cell lung cancer                            | 3       | 338 | 100% | 100% | 100% |
| cetuximab | cisplatin      | pemetrexed              | advanced non-squamous non-small cell lung cancer               | 2       | 113 | 100% | 100% | 100% |
| cetuximab | cisplatin      | pemetrexed              | squamous cell carcinoma of the head and neck                   | 2       | 66  | 100% | 100% | 100% |
| cetuximab | docetaxel      | gemcitabine             | non-small cell lung cancer                                     | 2       | 69  | 100% | 100% | 100% |
| cetuximab | docetaxel      | oxaliplatin             | metastatic gastric or gastroesophageal junction adenocarcinoma | 2       | 75  | 100% | 100% | 100% |
| cetuximab | gemcitabine    | oxaliplatin             | advanced pancreatic cancer                                     | 2       | 41  | 100% | 100% | 67%  |

|             |                |                |                                                                                       |         |     |      |      |      |
|-------------|----------------|----------------|---------------------------------------------------------------------------------------|---------|-----|------|------|------|
| cetuximab   | gemcitabine    | oxaliplatin    | metastatic biliary tract cancer                                                       | 2       | 30  | 100% | 100% | 67%  |
| cetuximab   | irinotecan     | oxaliplatin    | advanced gastric cancer                                                               | 2       | 51  | 100% | 75%  | 100% |
| cetuximab   | irinotecan     | sorafenib      | advanced colorectal cancer                                                            | 1       | 18  | 100% | 100% | 80%  |
| cetuximab   | irinotecan     | vandetanib     | metastatic colorectal cancer                                                          | 1       | 27  | 100% | 67%  | 93%  |
| cetuximab   | oxaliplatin    | tegafur-uracil | metastatic colorectal cancer                                                          | 2       | 151 | 100% | 100% | 83%  |
| CKD-732     | capecitabine   | oxaliplatin    | metastatic colorectal cancer                                                          | 1       | 9   | 33%  | 100% | 80%  |
| conatumumab | 5-fluorouracil | irinotecan     | KRAS mutant metastatic colorectal cancer                                              | 2       | 50  | 50%  | 100% | 100% |
| conatumumab | carboplatin    | paclitaxel     | advanced non-small cell lung cancer                                                   | 2       | 109 | 50%  | 100% | 100% |
| CP-868,596  | axitinib       | docetaxel      | advanced solid tumors                                                                 | 1       | 9   | 60%  | 100% | 100% |
| CP-870,893  | carboplatin    | paclitaxel     | advanced solid tumors                                                                 | 1       | 32  | 100% | 100% | 100% |
| custirsen   | carboplatin    | gemcitabine    | non-small cell lung cancer                                                            | 1 and 2 | 15  | 67%  | 100% | 100% |
| custirsen   | cisplatin      | gemcitabine    | non-small cell lung cancer                                                            | 1 and 2 | 60  | 67%  | 100% | 100% |
| dalotuzumab | cetuximab      | irinotecan     | colorectal cancer                                                                     | 1       | 20  | 100% | 100% | 90%  |
| enzastaurin | carboplatin    | paclitaxel     | ovarian cancer                                                                        | 2       | 69  | 95%  | 100% | 100% |
| enzastaurin | carboplatin    | pemetrexed     | non-small cell lung cancer                                                            | 2       | 72  | 95%  | 100% | 100% |
| enzastaurin | cisplatin      | pemetrexed     | non-small cell lung cancer                                                            | 2       | 35  | 95%  | 100% | 100% |
| erlotinib   | 5-fluorouracil | oxaliplatin    | metastatic or advanced adenocarcinoma of the esophagus and gastro-esophageal junction | 2       | 33  | 100% | 100% | 100% |
| erlotinib   | bevacizumab    | cetuximab      | non-small cell lung cancer                                                            | 1       | 34  | 100% | 100% | 100% |
| erlotinib   | capecitabine   | gemcitabine    | pancreatic cancer                                                                     | 2       | 47  | 67%  | 100% | 75%  |
| erlotinib   | capecitabine   | gemcitabine    | advanced pancreatic cancer                                                            | 1       | 16  | 83%  | 75%  | 100% |
| erlotinib   | carboplatin    | gemcitabine    | non-small cell lung cancer                                                            | 3       | 205 | 50%  | 100% | 100% |
| erlotinib   | carboplatin    | paclitaxel     | lung adenocarcinoma                                                                   | 2       | 100 | 100% | 100% | 100% |
| erlotinib   | carboplatin    | paclitaxel     | ovarian cancer                                                                        | 2       | 56  | 100% | 100% | 100% |
| erlotinib   | carboplatin    | paclitaxel     | non-small cell lung cancer                                                            | 3       | 209 | 100% | 100% | 100% |
| erlotinib   | cisplatin      | gemcitabine    | non-small cell lung cancer                                                            | 3       | 17  | 50%  | 75%  | 100% |
| erlotinib   | cisplatin      | gemcitabine    | advanced pancreatic cancer                                                            | 2       | 22  | 67%  | 100% | 67%  |
| everolimus  | carboplatin    | paclitaxel     | metastatic melanoma                                                                   | 2       | 70  | 50%  | 100% | 100% |
| everolimus  | cisplatin      | docetaxel      | head and neck cancer                                                                  | 1       | 15  | 75%  | 100% | 100% |
| everolimus  | cisplatin      | etoposide      | small cell lung cancer                                                                | 1       | 40  | 25%  | 100% | 100% |
| everolimus  | cytarabine     | daunorubicin   | acute myeloid leukemia                                                                | 1       | 28  | 50%  | 100% | 100% |



|                       |                |              |                                                |         |     |      |      |      |
|-----------------------|----------------|--------------|------------------------------------------------|---------|-----|------|------|------|
| everolimus            | paclitaxel     | trastuzumab  | HER2 positive breast cancer                    | 2       | 55  | 100% | 100% | 100% |
| everolimus            | paclitaxel     | trastuzumab  | metastatic breast cancer                       | 1       | 33  | 100% | 100% | 100% |
| figitumumab           | carboplatin    | paclitaxel   | advanced non-small cell lung cancer            | 1       | 18  | 100% | 100% | 100% |
| flavopiridol          | 5-fluorouracil | irinotecan   | advanced solid tumors                          | 1       | 63  | 100% | 100% | 100% |
| flavopiridol          | gemcitabine    | irinotecan   | advanced solid tumors                          | 1       | 14  | 100% | 100% | 48%  |
| ganitumab             | 5-fluorouracil | irinotecan   | KRAS mutant metastatic colorectal cancer       | 2       | 51  | 50%  | 100% | 100% |
| gefitinib             | carboplatin    | paclitaxel   | ovarian, tubal, or peritoneal adenocarcinoma   | 2       | 68  | 100% | 100% | 100% |
| gefitinib             | cytoxan        | epirubicin   | estrogen receptor negative early breast cancer | 2       | 94  | 100% | 100% | 86%  |
| gefitinib             | irinotecan     | paclitaxel   | non-small cell lung cancer                     | 2       | 16  | 33%  | 91%  | 24%  |
| gemtuzumab ozogamicin | cytarabine     | daunorubicin | acute myeloid leukemia                         | 1       | 10  | 33%  | 100% | 100% |
| gemtuzumab ozogamicin | cytarabine     | daunorubicin | acute myeloid leukemia                         | 3       | 295 | 33%  | 100% | 100% |
| gemtuzumab ozogamicin | cytarabine     | daunorubicin | acute myeloid leukemia                         | 1 and 2 | 20  | 50%  | 100% | 100% |
| gemtuzumab ozogamicin | cytarabine     | idarubicin   | acute myeloid leukemia                         | 1       | 9   | 33%  | 100% | 100% |
| imatinib              | bevacizumab    | cytoxan      | advanced colorectal cancer                     | 1       | 35  | 50%  | 50%  | 70%  |
| imatinib              | cisplatin      | pemetrexed   | pleural mesothelioma                           | 1       | 17  | 100% | 75%  | 75%  |
| imatinib              | cytarabine     | daunorubicin | c-kit positive acute myeloid leukemia          | 1       | 21  | 75%  | 100% | 100% |
| imatinib              | docetaxel      | gemcitabine  | refractory/relapsed solid tumors               | 1       | 19  | 48%  | 60%  | 50%  |
| imatinib              | gemcitabine    | oxaliplatin  | pancreatic cancer                              | 1       | 27  | 50%  | 100% | 67%  |
| iniparib              | carboplatin    | gemcitabine  | metastatic triple-negative breast cancer       | 2       | 61  | 37%  | 100% | 38%  |
| iniparib              | carboplatin    | paclitaxel   | uterine carcinosarcoma                         | 2       | 17  | 40%  | 100% | 100% |
| lapatinib             | gemcitabine    | paclitaxel   | breast cancer                                  | 1       | 13  | 56%  | 100% | 91%  |
| lapatinib             | paclitaxel     | trastuzumab  | HER positive breast cancer                     | 2       | 92  | 56%  | 100% | 100% |
| lapatinib             | paclitaxel     | trastuzumab  | HER2 positive breast cancer                    | 3       | 171 | 42%  | 100% | 100% |
| lapatinib             | cytoxan        | epirubicin   | breast cancer                                  | 3       | 311 | 69%  | 100% | 100% |

|              |                |             |                                                                      |   |     |      |      |      |
|--------------|----------------|-------------|----------------------------------------------------------------------|---|-----|------|------|------|
| lenvatinib   | carboplatin    | paclitaxel  | non-small cell lung cancer                                           | 1 | 28  | 33%  | 100% | 100% |
| lonafarnib   | carboplatin    | paclitaxel  | ovarian cancer                                                       | 2 | 53  | 100% | 100% | 100% |
| mapatumumab  | carboplatin    | paclitaxel  | non-small cell lung cancer                                           | 2 | 73  | 100% | 100% | 100% |
| motesanib    | carboplatin    | paclitaxel  | non-small cell lung cancer                                           | 1 | 23  | 100% | 100% | 100% |
| motesanib    | carboplatin    | paclitaxel  | non-squamous non-small cell lung cancer                              | 2 | 123 | 100% | 100% | 100% |
| motesanib    | carboplatin    | paclitaxel  | non-squamous non-small-cell lung cancer                              | 3 | 531 | 100% | 100% | 100% |
| motesanib    | erlotinib      | gemcitabine | solid tumors                                                         | 1 | 34  | 100% | 67%  | 100% |
| nintedanib   | carboplatin    | paclitaxel  | gynceological malignancies                                           | 1 | 22  | 89%  | 100% | 100% |
| obatoclox    | carboplatin    | etoposide   | small cell lung cancer                                               | 1 | 25  | 54%  | 100% | 100% |
| obinutuzumab | cytoxan        | fludarabine | relapsed/refractory follicular lymphoma                              | 1 | 28  | 80%  | 60%  | 80%  |
| olaparib     | cisplatin      | gemcitabine | advanced solid tumors                                                | 1 | 23  | 1%   | 80%  | 56%  |
| panitumumab  | 5-fluorouracil | cisplatin   | recurrent or metastatic squamous-cell carcinoma of the head and neck | 3 | 325 | 100% | 100% | 100% |
| panitumumab  | 5-fluorouracil | irinotecan  | metastatic colorectal cancer                                         | 2 | 154 | 100% | 100% | 100% |
| panitumumab  | 5-fluorouracil | irinotecan  | metastatic colorectal cancer                                         | 3 | 591 | 100% | 100% | 100% |
| panitumumab  | 5-fluorouracil | oxaliplatin | metastatic colorectal cancer                                         | 3 | 593 | 100% | 100% | 100% |
| panitumumab  | capecitabine   | oxaliplatin | colon cancer with liver metastases                                   | 2 | 49  | 100% | 100% | 80%  |
| panitumumab  | carboplatin    | paclitaxel  | advanced non-small cell lung cancer                                  | 2 | 131 | 42%  | 100% | 100% |
| panitumumab  | gemcitabine    | irinotecan  | cholangiocarcinoma                                                   | 2 | 35  | 100% | 100% | 100% |
| panobinostat | carboplatin    | paclitaxel  | solid tumors                                                         | 1 | 21  | 50%  | 100% | 100% |
| pazopanib    | 5-fluorouracil | oxaliplatin | colorectal cancer                                                    | 1 | 21  | 100% | 100% | 100% |
| pazopanib    | capecitabine   | oxaliplatin | colorectal cancer                                                    | 1 | 29  | 100% | 100% | 68%  |
| pazopanib    | carboplatin    | paclitaxel  | solid tumors                                                         | 1 | 34  | 25%  | 100% | 100% |
| pertuzumab   | carboplatin    | gemcitabine | ovarian cancer                                                       | 2 | 37  | 100% | 100% | 100% |
| pertuzumab   | carboplatin    | paclitaxel  | ovarian cancer                                                       | 2 | 37  | 100% | 100% | 100% |
| pertuzumab   | docetaxel      | trastuzumab | HER2 positive breast cancer                                          | 2 | 148 | 100% | 100% | 100% |
| pertuzumab   | docetaxel      | trastuzumab | metastatic breast cancer                                             | 3 | 397 | 100% | 100% | 100% |
| PF-3512676   | carboplatin    | paclitaxel  | advanced non-small cell lung cancer                                  | 1 | 12  | 37%  | 100% | 100% |

|                      |                |                           |                                                                           |         |     |      |      |      |
|----------------------|----------------|---------------------------|---------------------------------------------------------------------------|---------|-----|------|------|------|
| PF-3512676           | carboplatin    | paclitaxel                | advanced non-small cell lung cancer                                       | 3       | 383 | 37%  | 100% | 100% |
| PF-3512676           | cisplatin      | gemcitabine               | advanced non-small cell lung cancer                                       | 3       | 416 | 37%  | 100% | 100% |
| pomalidomide         | cisplatin      | etoposide                 | extensive-stage small-cell lung cancer                                    | 1       | 22  | 89%  | 33%  | 100% |
| regorafenib          | 5-fluorouracil | oxaliplatin or irinotecan | colorectal cancer                                                         | 2       | 45  | 67%  | 100% | 100% |
| rituximab            | bendamustine   | lenalidomide              | aggressive B cell lymphoma                                                | 1       | 14  | 25%  | 40%  | 70%  |
| rituximab            | cytoxan        | flavopiridol              | chronic lymphocytic leukemia                                              | 1       | 9   | 70%  | 25%  | 53%  |
| rituximab            | cytoxan        | fludarabine               | chronic lymphocytic leukemia                                              | 3       | 92  | 25%  | 64%  | 80%  |
| rituximab            | cytoxan        | fludarabine               | advanced indolent B-cell non-follicular lymphomas                         | 2       | 46  | 25%  | 60%  | 80%  |
| rituximab            | cytoxan        | fludarabine               | chronic lymphocytic leukemia                                              | 3       | 82  | 33%  | 96%  | 80%  |
| rituximab            | cytoxan        | fludarabine               | chronic lymphocytic leukemia                                              | 3       | 408 | 33%  | 60%  | 80%  |
| rituximab            | cytoxan        | fludarabine               | chronic lymphocytic leukemia                                              | 3       | 276 | 33%  | 60%  | 45%  |
| rituximab            | cytoxan        | pentostatin               | chronic lymphocytic leukemia                                              | 3       | 92  | 33%  | 86%  | 25%  |
| rituximab            | epirubicin     | fludarabine               | chronic lymphocytic leukemia and prolymphocytic leukemia                  | 2       | 44  | 33%  | 100% | 50%  |
| rituximab            | fludarabine    | mitoxantrone              | follicular lymphoma                                                       | 2       | 55  | 25%  | 60%  | 63%  |
| rituximab            | fludarabine    | mitoxantrone              | follicular or marginal zone lymphoma                                      | 2       | 18  | 25%  | 60%  | 75%  |
| rituximab            | fludarabine    | mitoxantrone              | recurrent or refractory rituximab naïve follicular non-Hodgkin's lymphoma | 2       | 50  | 25%  | 60%  | 63%  |
| rituximab            | gemcitabine    | oxaliplatin               | diffuse large B-cell lymphoma                                             | 2       | 48  | 50%  | 83%  | 100% |
| sarcatinib           | carboplatin    | paclitaxel                | advanced solid tumors                                                     | 1       | 116 | 100% | 100% | 100% |
| semaxanib            | cisplatin      | irinotecan                | advanced solid tumors                                                     | 1       | 13  | 45%  | 40%  | 100% |
| sepantronium bromide | carboplatin    | paclitaxel                | non-small cell lung cancer                                                | 1 and 2 | 41  | 89%  | 100% | 100% |
| sorafenib            | 5-fluorouracil | cisplatin                 | nasopharyngeal carcinoma                                                  | 2       | 54  | 100% | 100% | 100% |
| sorafenib            | 5-fluorouracil | oxaliplatin               | metastatic colorectal cancer                                              | 2       | 97  | 100% | 100% | 100% |
| sorafenib            | capecitabine   | cisplatin                 | gastric cancer                                                            | 1       | 21  | 100% | 80%  | 64%  |
| sorafenib            | capecitabine   | gemcitabine               | advanced renal cell carcinoma                                             | 1       | 15  | 50%  | 75%  | 33%  |

|           |                |             |                                                      |         |     |      |      |      |
|-----------|----------------|-------------|------------------------------------------------------|---------|-----|------|------|------|
| sorafenib | capecitabine   | gemcitabine | metastatic renal cell carcinoma                      | 2       | 40  | 100% | 100% | 40%  |
| sorafenib | capecitabine   | oxaliplatin | pancreatic and biliary tract cancer                  | 1       | 16  | 50%  | 100% | 58%  |
| sorafenib | carboplatin    | paclitaxel  | non-small cell lung cancer                           | 1       | 13  | 43%  | 100% | 100% |
| sorafenib | carboplatin    | paclitaxel  | non-small cell lung cancer                           | 3       | 464 | 100% | 100% | 100% |
| sorafenib | carboplatin    | paclitaxel  | uveal melanoma                                       | 2       | 24  | 100% | 100% | 100% |
| sorafenib | carboplatin    | paclitaxel  | metastatic melanoma                                  | 3       | 393 | 86%  | 100% | 100% |
| sorafenib | carboplatin    | pemetrexed  | solid tumors                                         | 1       | 20  | 50%  | 100% | 100% |
| sorafenib | cisplatin      | docetaxel   | gastric and gastroesophageal junction adenocarcinoma | 2       | 44  | 100% | 100% | 100% |
| sorafenib | cisplatin      | gemcitabine | advanced biliary adenocarcinomas                     | 2       | 37  | 50%  | 53%  | 89%  |
| sorafenib | cisplatin      | gemcitabine | advanced non-squamous non-small cell lung cancer     | 3       | 385 | 100% | 100% | 100% |
| sorafenib | cisplatin      | gemcitabine | refractory solid tumors                              | 1       | 19  | 100% | 100% | 100% |
| sorafenib | cisplatin      | gemcitabine | pancreatic cancer                                    | 2       | 44  | 100% | 100% | 67%  |
| sorafenib | cisplatin      | S-1         | gastric cancer                                       | 1       | 13  | 100% | 90%  | 48%  |
| sorafenib | cytarabine     | idarubicin  | acute myeloid leukemia                               | 1 and 2 | 61  | 25%  | 100% | 100% |
| sunitinib | 5-fluorouracil | cisplatin   | gastric cancer                                       | 1       | 34  | 50%  | 100% | 80%  |
| sunitinib | 5-fluorouracil | irinotecan  | colorectal cancer                                    | 2       | 71  | 75%  | 100% | 100% |
| sunitinib | 5-fluorouracil | irinotecan  | colorectal cancer                                    | 3       | 386 | 75%  | 100% | 100% |
| sunitinib | 5-fluorouracil | irinotecan  | metastatic colorectal cancer                         | 1       | 37  | 75%  | 100% | 100% |
| sunitinib | 5-fluorouracil | oxaliplatin | advanced solid malignancies                          | 1       | 53  | 75%  | 100% | 100% |
| sunitinib | 5-fluorouracil | oxaliplatin | colorectal cancer                                    | 1       | 12  | 75%  | 100% | 100% |
| sunitinib | bevacizumab    | paclitaxel  | metastatic breast cancer                             | 2       | 23  | 56%  | 100% | 77%  |
| sunitinib | capecitabine   | cisplatin   | advanced gastric cancer                              | 1       | 28  | 50%  | 80%  | 100% |
| sunitinib | capecitabine   | oxaliplatin | advanced gastric cancer                              | 1       | 48  | 75%  | 64%  | 85%  |
| sunitinib | carboplatin    | paclitaxel  | advanced solid tumors                                | 1       | 43  | 50%  | 100% | 100% |
| sunitinib | carboplatin    | pemetrexed  | advanced solid tumors                                | 1       | 24  | 75%  | 100% | 100% |
| sunitinib | cisplatin      | gemcitabine | bladder cancer                                       | 2       | 36  | 75%  | 100% | 100% |
| sunitinib | cisplatin      | gemcitabine | bladder cancer                                       | 2       | 9   | 75%  | 80%  | 80%  |
| sunitinib | cisplatin      | gemcitabine | non-small cell lung cancer                           | 1       | 28  | 75%  | 100% | 100% |
| sunitinib | cisplatin      | pemetrexed  | non-small cell lung cancer and mesothelioma          | 1       | 31  | 75%  | 100% | 100% |

|              |                |                                 |                                              |         |     |      |      |      |
|--------------|----------------|---------------------------------|----------------------------------------------|---------|-----|------|------|------|
| sunitinib    | cisplatin      | S-1                             | advanced or metastatic gastric cancer        | 1       | 27  | 38%  | 100% | 60%  |
| telatinib    | capecitabine   | irinotecan                      | advanced solid tumors                        | 1       | 23  | 100% | 80%  | 72%  |
| temsirolimus | carboplatin    | paclitaxel                      | advanced solid tumors                        | 1       | 38  | 67%  | 100% | 100% |
| temsirolimus | carboplatin    | paclitaxel                      | squamous cell carcinoma of the head neck     | 1       | 18  | 67%  | 91%  | 57%  |
| tigatuzumab  | carboplatin    | paclitaxel                      | non-small cell lung cancer                   | 2       | 49  | 33%  | 100% | 100% |
| tipifarnib   | cytarabine     | idarubicin                      | acute myeloid leukemia                       | 1 and 2 | 82  | 75%  | 100% | 100% |
| trastuzumab  | 5-fluorouracil | cisplatin                       | gastric and gastroesophageal junction cancer | 3       | 38  | 100% | 100% | 95%  |
| trastuzumab  | bevacizumab    | docetaxel                       | breast cancer                                | 3       | 424 | 100% | 100% | 100% |
| trastuzumab  | bevacizumab    | lapatinib                       | metastatic breast cancer                     | 1       | 26  | 100% | 100% | 69%  |
| trastuzumab  | bevacizumab    | vinorelbine                     | HER2 positive breast cancer                  | 2       | 29  | 100% | 100% | 100% |
| trastuzumab  | capecitabine   | cisplatin                       | gastric and gastroesophageal junction cancer | 3       | 256 | 100% | 100% | 80%  |
| trastuzumab  | capecitabine   | docetaxel                       | HER2 positive metastatic breast cancer       | 2       | 29  | 100% | 100% | 38%  |
| trastuzumab  | capecitabine   | docetaxel                       | metastatic breast cancer                     | 2       | 113 | 100% | 100% | 76%  |
| trastuzumab  | capecitabine   | vinorelbine                     | breast cancer                                | 2       | 50  | 100% | 80%  | 67%  |
| trastuzumab  | capecitabine   | vinorelbine                     | HER2 positive metastatic breast cancer       | 2       | 45  | 100% | 68%  | 67%  |
| trastuzumab  | carboplatin    | docetaxel                       | HER2 positive breast cancer                  | 3       | 131 | 100% | 100% | 100% |
| trastuzumab  | carboplatin    | nab-paclitaxel                  | HER2 positive metastatic breast cancer       | 2       | 32  | 100% | 33%  | 100% |
| trastuzumab  | carboplatin    | paclitaxel                      | aggressive HER2-positive breast cancers      | 2       | 29  | 100% | 100% | 100% |
| trastuzumab  | carboplatin    | paclitaxel                      | aggressive HER2-positive breast cancers      | 2       | 27  | 100% | 100% | 100% |
| trastuzumab  | cisplatin      | docetaxel                       | breast cancer                                | 2       | 30  | 100% | 100% | 67%  |
| trastuzumab  | cytoxan        | nab-paclitaxel                  | HER2 positive breast cancer                  | 2       | 8   | 100% | 89%  | 86%  |
| trastuzumab  | cytoxan        | pegylated liposomal doxorubicin | HER2 positive metastatic breast cancer       | 2       | 48  | 100% | 100% | 64%  |
| trastuzumab  | cytoxan        | docetaxel                       | breast cancer                                | 2       | 493 | 100% | 86%  | 100% |

|             |                |                                     |                                        |         |     |      |      |      |
|-------------|----------------|-------------------------------------|----------------------------------------|---------|-----|------|------|------|
| trastuzumab | cytoxan        | epirubicin                          | breast cancer                          | 3       | 309 | 100% | 100% | 100% |
| trastuzumab | cytoxan        | epirubicin                          | HER2 positive metastatic breast cancer | 2       | 69  | 100% | 100% | 86%  |
| trastuzumab | docetaxel      | gefitinib                           | metastatic breast cancer               | 1 and 2 | 31  | 100% | 62%  | 100% |
| trastuzumab | docetaxel      | non-pegylated liposomal doxorubicin | metastatic breast cancer               | 2       | 31  | 100% | 100% | 67%  |
| trastuzumab | docetaxel      | pertuzumab                          | HER2 positive breast cancer            | 2       | 107 | 100% | 100% | 100% |
| trastuzumab | docetaxel      | vinorelbine                         | HER2 positive metastatic breast cancer | 2       | 76  | 100% | 100% | 73%  |
| trastuzumab | everolimus     | vinorelbine                         | metastatic breast cancer               | 1       | 50  | 100% | 50%  | 67%  |
| trastuzumab | gemcitabine    | paclitaxel                          | HER2 positive breast cancer            | 2       | 53  | 100% | 100% | 91%  |
| trastuzumab | lapatinib      | paclitaxel                          | HER2 positive breast cancer            | 2       | 109 | 100% | 43%  | 100% |
| trastuzumab | neratinib      | paclitaxel                          | HER2 positive breast cancer            | 1       | 21  | 100% | 63%  | 100% |
| trasuzumab  | docetaxel      | lapatinib                           | HER2 positive breast cancer            | 1       | 53  | 100% | 69%  | 100% |
| trebananib  | 5-fluorouracil | irinotecan                          | colorectal cancer                      | 2       | 95  | 33%  | 100% | 100% |
| trebananib  | 5-fluorouracil | oxaliplatin                         | advanced solid tumors                  | 1       | 6   | 33%  | 100% | 100% |
| trebananib  | capecitabine   | cisplatin                           | gastroesophageal cancer                | 2       | 171 | 33%  | 80%  | 80%  |
| trebananib  | carboplatin    | paclitaxel                          | advanced solid tumors                  | 1       | 7   | 33%  | 100% | 100% |
| TSU-68      | carboplatin    | paclitaxel                          | non-small cell lung cancer             | 1       | 37  | 55%  | 100% | 100% |
| TSU-68      | cisplatin      | S-1                                 | advanced gastric cancer                | 2       | 45  | 100% | 100% | 48%  |
| TSU-68      | oxaliplatin    | S-1                                 | metastatic colorectal cancer           | 1       | 11  | 28%  | 100% | 88%  |
| vadimezan   | carboplatin    | paclitaxel                          | advanced non-small cell lung cancer    | 3       | 649 | 49%  | 100% | 100% |
| vadimezan   | carboplatin    | paclitaxel                          | small-cell lung cancer                 | 2       | 17  | 49%  | 100% | 100% |
| vandetanib  | capecitabine   | oxaliplatin                         | metastatic colorectal cancer           | 1       | 9   | 100% | 100% | 100% |
| vandetanib  | carboplatin    | docetaxel                           | non-small cell lung cancer             | 2       | 158 | 100% | 100% | 100% |
| vandetanib  | cisplatin      | gemcitabine                         | non-small cell lung cancer             | 1       | 8   | 33%  | 100% | 100% |
| vandetanib  | cisplatin      | vinorelbine                         | non-small cell lung cancer             | 1       | 9   | 33%  | 100% | 67%  |
| vandetanib  | docetaxel      | oxaliplatin                         | advanced gastroesophageal cancer       | 1       | 9   | 33%  | 100% | 62%  |
| vatalanib   | 5-fluorouracil | oxaliplatin                         | metastatic colon cancer                | 3       | 426 | 83%  | 100% | 100% |
| vatalinib   | 5-fluorouracil | oxaliplatin                         | metastatic colorectal cancer           | 3       | 579 | 83%  | 100% | 100% |
| volociximab | carboplatin    | paclitaxel                          | non-small cell lung cancer             | 1       | 29  | 67%  | 100% | 100% |
| vorinostat  | azacitidine    | gemtuzumab ozogamicin               | acute myeloid leukemia                 | 1 and 2 | 52  | 75%  | 33%  | 100% |

|            |              |            |                                                                                  |   |    |     |      |      |
|------------|--------------|------------|----------------------------------------------------------------------------------|---|----|-----|------|------|
| vorinostat | capecitabine | cisplatin  | advanced gastric cancer                                                          | 1 | 30 | 67% | 80%  | 80%  |
| vorinostat | carboplatin  | paclitaxel | advanced non-small cell lung cancer                                              | 2 | 62 | 67% | 100% | 100% |
| vorinostat | cytarabine   | idarubicin | acute myeloid leukemia                                                           | 2 | 75 | 60% | 100% | 100% |
| vorinostat | carboplatin  | paclitaxel | advanced-stage epithelial ovarian, primary peritoneal, and fallopian tube cancer | 2 | 18 | 25% | 100% | 100% |
| zibotentan | carboplatin  | paclitaxel | advanced ovarian cancer                                                          | 2 | 59 | 67% | 100% | 100% |
